# Supplementary material for: Novel Alumina Matrix Composites Reinforced with MAX Phases—Microstructure Analysis and Mechanical Properties
Source: MDPI journal article supplement (doi:10.3390/ma15196909), 2022-10-05
Supplement: s1 [file s1]

Supplementary Material

# Novel Alumina Matrix Composites Reinforced with MAX Phases—Microstructure Analysis and Mechanical Properties

Mateusz Petrus <sup>1</sup>, Jarosław Wozniak <sup>1,\*</sup>, Tomasz Cygan <sup>1</sup>, Wojciech Pawlak <sup>2</sup> and Andrzej Olszyna <sup>1</sup>

<sup>1</sup> Faculty of Material Science and Engineering, Warsaw University of Technology, ul. Wołoska 141, 02-507 Warsaw, Poland

<sup>2</sup> Faculty of Mechanical Engineering, Lodz University of Technology, Stefanowskiego 1/15 St, 90-924 Lodz, Poland

\* Correspondence: jaroslaw.wozniak@pw.edu.pl

## Supplementary information

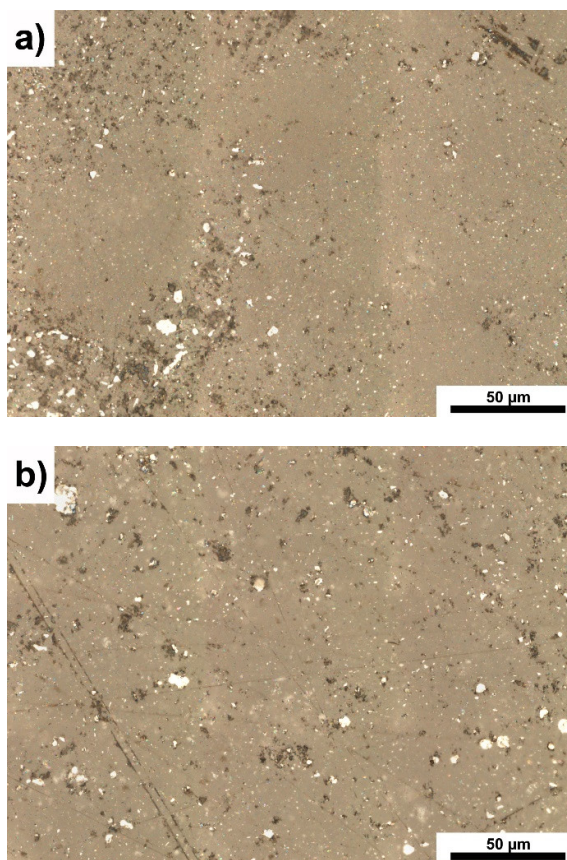

**Citation:** Petrus, M.; Wozniak, J.; Cygan, T.; Pawlak, W.; Olszyna, A. Novel Alumina Matrix Composites Reinforced with MAX Phases—Microstructure Analysis and Mechanical Properties. *Materials* **2022**, *15*, 6909. <https://doi.org/10.3390/ma15196909>

Academic Editor: Yin Fan

Received: 09 September 2022

Accepted: 30 September 2022

Published: 5 October 2022

**Publisher's Note:** MDPI stays neutral with regard to jurisdictional claims in published maps and institutional affiliations.

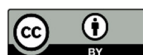

**Copyright:** © 2022 by the authors. Licensee MDPI, Basel, Switzerland. This article is an open access article distributed under the terms and conditions of the Creative Commons Attribution (CC BY) license (<https://creativecommons.org/licenses/by/4.0/>).

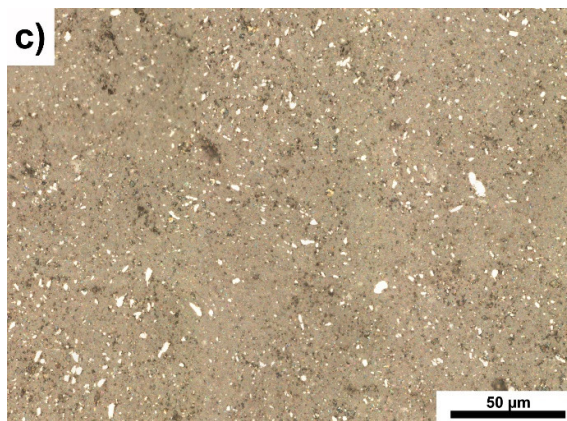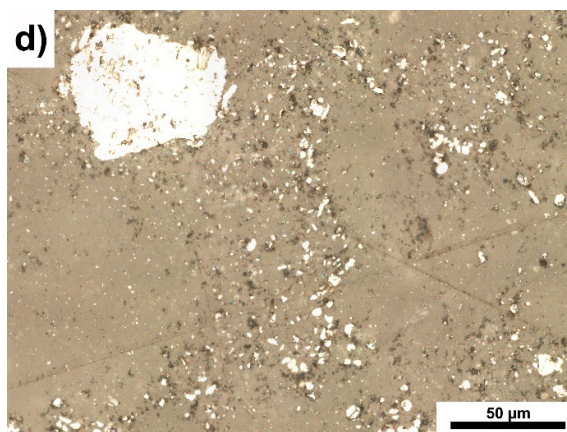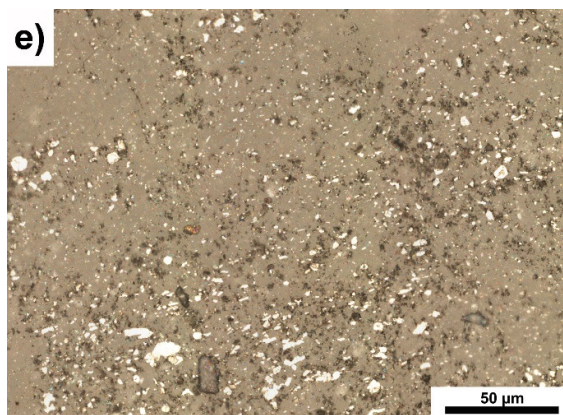



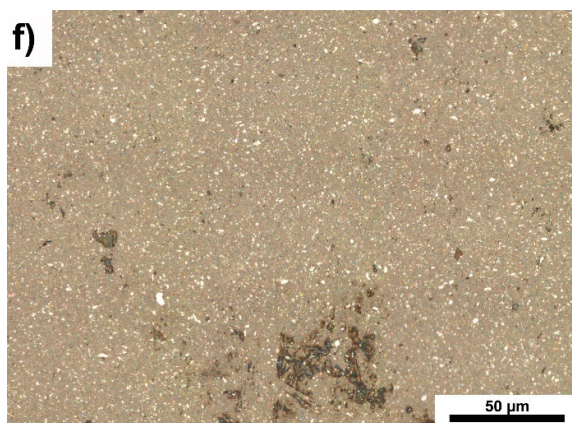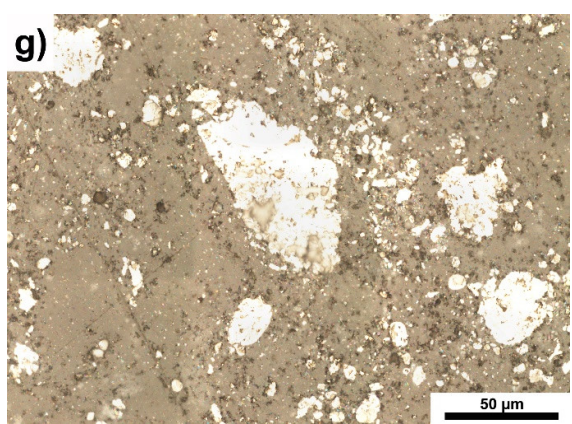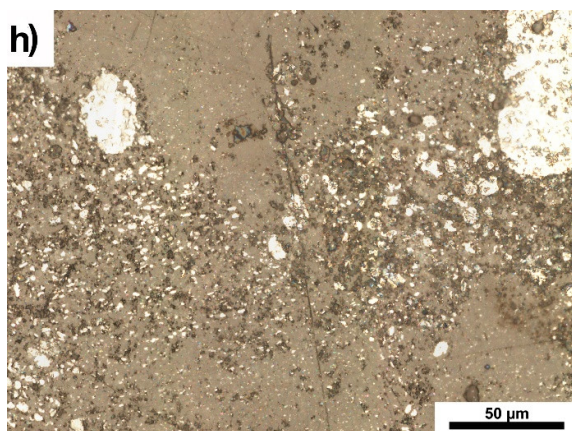

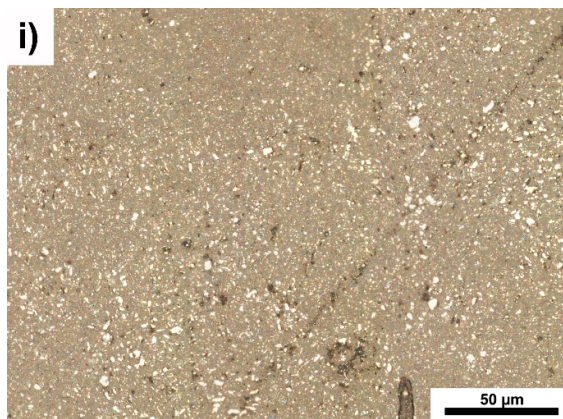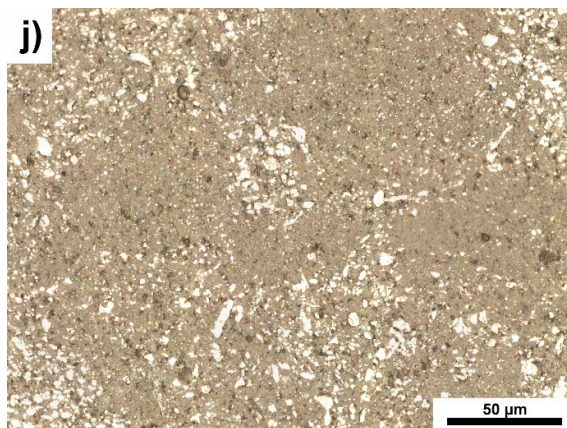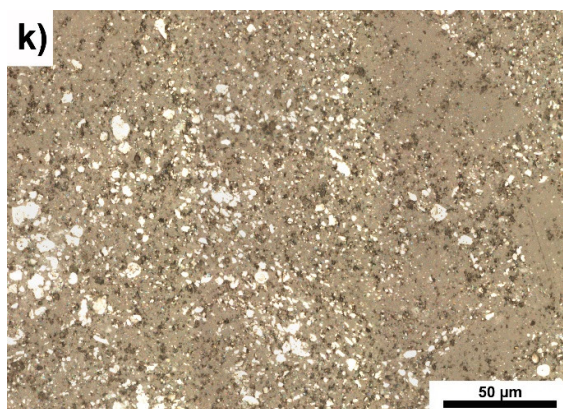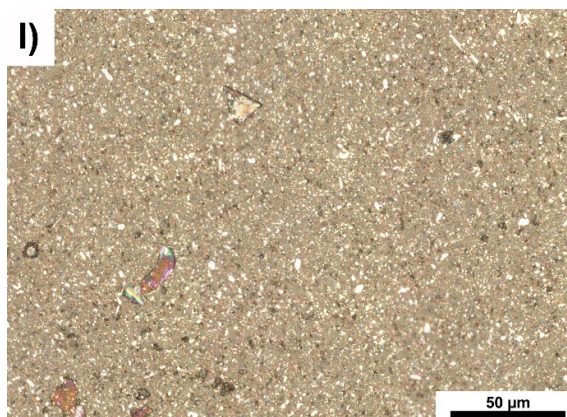

**Scheme S1.** AlC<sub>2</sub> phase for obtained composites. **a)** Al<sub>2</sub>O<sub>3</sub> — 5wt% Ti<sub>3</sub>AlC<sub>2</sub> from attritor mill; **b)** Al<sub>2</sub>O<sub>3</sub> — 5wt% Ti<sub>3</sub>AlC<sub>2</sub> from horizontal mill; **c)** Al<sub>2</sub>O<sub>3</sub> — 5wt% Ti<sub>3</sub>AlC<sub>2</sub> from planetary mill; **d)** Al<sub>2</sub>O<sub>3</sub> — 10wt% Ti<sub>3</sub>AlC<sub>2</sub> from attritor mill; **e)** Al<sub>2</sub>O<sub>3</sub> — 10wt% Ti<sub>3</sub>AlC<sub>2</sub> from horizontal mill; **f)** Al<sub>2</sub>O<sub>3</sub> — 10wt% Ti<sub>3</sub>AlC<sub>2</sub> from planetary mill; **g)** Al<sub>2</sub>O<sub>3</sub> — 15wt% Ti<sub>3</sub>AlC<sub>2</sub> from attritor mill; **h)** Al<sub>2</sub>O<sub>3</sub> — 15wt% Ti<sub>3</sub>AlC<sub>2</sub> from horizontal mill; **i)** Al<sub>2</sub>O<sub>3</sub> — 15wt% Ti<sub>3</sub>AlC<sub>2</sub> from planetary mill; **j)** Al<sub>2</sub>O<sub>3</sub> — 20wt% Ti<sub>3</sub>AlC<sub>2</sub> from attritor mill; **k)** Al<sub>2</sub>O<sub>3</sub> — 20wt% Ti<sub>3</sub>AlC<sub>2</sub> from horizontal mill; **l)** Al<sub>2</sub>O<sub>3</sub> — 20wt% Ti<sub>3</sub>AlC<sub>2</sub> from planetary mill
